# Supplementary material
Source: publisher site journal article supplement (https://www.dovepress.com/article/261175)
Supplement: Supplementary file 1 [file get_supplementary_file.php]

**Appendix 1. Extracted data from the outcome measures of included RCTs.**

| Author/year of publication                  | Outcome measures                                | Baseline outcomes (before intervention outcome) (Mean and SD) |               | Post intervention outcome (Mean and SD) |               |
|---------------------------------------------|-------------------------------------------------|---------------------------------------------------------------|---------------|-----------------------------------------|---------------|
|                                             |                                                 | Experimental group                                            | Control group | Experimental group                      | Control group |
| L. Allet et al, 2010 <sup>21</sup>          | Speed tarred surface (ms <sup>-1</sup> )        | 1.2 (0.1)                                                     | 1.2 (0.1)     | 1.3 (0.1)                               | 1.2 (0.1)     |
|                                             | Speed cobblestone surface (ms <sup>-1</sup> )   | 1.0 (0.2)                                                     | 1.1 (0.2)     | 1.1 (0.2)                               | 1.0 (0.2)     |
|                                             | Cadence (stride min <sup>-1</sup> )             | 55.0 (5.4)                                                    | 56.3 (5.3)    | 58.5 (5.1)                              | 56.1(4.4)     |
|                                             | Cadence cobblestone (stride min <sup>-1</sup> ) | 50.9 (5.8)                                                    | 52.5 (5.7)    | 55.8 (5.6)                              | 52.5 (5.4)    |
|                                             | Gait cycle time tarred surface (s)              | 1.1 (0.1)                                                     | 1.0 (0.1)     | 1.0 (0.1)                               | 1.0 (0.08)    |
|                                             | Gait cycle time cobblestone (s)                 | 1.2 (0.1)                                                     | 1.1 (0.1)     | 1.0 (0.1)                               | 1.1 (0.1)     |
|                                             | Stride length tarred surface (m)                | 1.3 (0.1)                                                     | 1.3 (0.1)     | 1.3 (0.1)                               | 1.3 (0.1)     |
|                                             | Stride length cobblestone (m)                   | 1.2 (0.1)                                                     | 1.2 (0.1)     | 1.2 (0.1)                               | 1.2 (0.2)     |
| Mueller MJ et al, 2013 <sup>38</sup>        | 6 minute walk distance (m)                      | 378 (72)                                                      | 418 (106)     | 404 (78)                                | 417 (112)     |
|                                             | Average daily step count (steps)                | 4909 (1398)                                                   | 6571 (2186)   | 5593 (1449)                             | 6078 (2023)   |
| BH EL-REFAY, OI ALI, 2013 <sup>20</sup>     | Gait assessment of stance phase                 |                                                               |               |                                         |               |
|                                             | Velocity (m/s)                                  | 0.7 (0.1)                                                     | 0.7 (0.02)    | 0.8 (0.2)                               | 0.7 (0.04)    |
|                                             | Cadence (steps/min)                             | 82.9 (8.2)                                                    | 85.3 (2.1)    | 89.5 (11.2)                             | 85.5 (3.9)    |
|                                             | Step time (s)                                   | 0.8 (0.2)                                                     | 0.8 (0.1)     | 0.6 (0.2)                               | 0.8 (0.04)    |
|                                             | Double support time (s)                         | 0.5 (0.1)                                                     | 0.4 (0.1)     | 0.4 (0.1)                               | 0.4 (0.02)    |
|                                             | Ankle ROM of stance phase (°)                   | 19.4 (2.4)                                                    | 18.6 (0.7)    | 20.4 (2.2)                              | 18.6 (0.9)    |
| Cristina D Sartor et al, 2014 <sup>25</sup> | Time-to-Peak pressure (PP)                      |                                                               |               |                                         |               |
|                                             | Heel                                            | 17.4 (5.4)                                                    | 17.9 (6)      | 17.7 (4.6)                              | 18.1 (5.5)    |
|                                             | Lateral forefoot                                | 82 (3.7)                                                      | 80.3 (4.6)    | 80.3 (3.2)                              | 80.7 (3.1)    |

|  |                              |                |                |                |                |
|--|------------------------------|----------------|----------------|----------------|----------------|
|  | Midfoot                      | 51.2 (16.6)    | 54.2 (14.3)    | 46.6 (12.7)    | 53.5 (13.6)    |
|  | Medial forefoot              | 81.9 (4.4)     | 81.9 (4.4)     | 81.7 (3.3)     | 82.1 (2.3)     |
|  | Hallux                       | 85.0 (9.9)     | 85.8 (5.2)     | 84.8 (7.0)     | 85.6 (3.6)     |
|  | Toes                         | 83.2 (9.9)     | 83.5 (6.0)     | 82.5 (3.8)     | 83.1 (4.0)     |
|  | COP–mean velocity(m/s)       |                |                |                |                |
|  | Heel                         | 0.4 (0.1)      | 0.4 (0.1)      | 0.4 (0.1)      | 0.4 (0.1)      |
|  | Midfoot                      | 0.5 (0.1)      | 0.4 (0.1)      | 0.4 (0.1)      | 0.5 (0.1)      |
|  | Medial forefoot              | 0.3 (0.1)      | 0.3 (0.1)      | 0.3 (0.1)      | 0.3 (0.1)      |
|  | Lateral forefoot             | 0.3 (0.1)      | 0.3 (0.2)      | 0.2 (0.1)      | 0.3 (0.1)      |
|  | Hallux                       | 0.1 (0.2)      | 0.2 (0.2)      | 0.2 (0.2)      | 0.2 (0.3)      |
|  | Toes                         | 0.1 (0.1)      | 0.1 (0.2)      | 0.1 (0.1)      | 0.1 (0.1)      |
|  | Total                        | 0.4 (0.1)      | 0.3 (0.05)     | 0.3 (0.0)      | 0.4 (0.04)     |
|  | Pressure–time integral (PTI) |                |                |                |                |
|  | Heel                         | 81.0 (26.8)    | 79.1 (22.3)    | 87.6 (23.8)    | 79.1 (17.3)    |
|  | Midfoot                      | 39.2 (14.7)    | 42.9 (20.9)    | 31.7 (9.1)     | 38.8 (20.6)    |
|  | Medial forefoot              | 101.2 (29.9)   | 90.2 (28.3)    | 103.7 (25.7)   | 93.8 (20.5)    |
|  | Lateral forefoot             | 92.4 (22.4)    | 90.9 (24.6)    | 88.2 (19.7)    | 92.6 (20.5)    |
|  | Hallux                       | 47.2 (21.4)    | 48.6 (22.6)    | 49.5 (24.6)    | 50.6 (19.2)    |
|  | Toes                         | 50.6 (22.9)    | 48.0 (24.1)    | 52.6 (21.4)    | 44.5 (22.6)    |
|  | Functional tests             |                |                |                |                |
|  | Ankle flexion                | 4.0 (1.0; 4.0) | 3.5 (1.0; 4.0) | 3.0 (1.0; 4.0) | 3.0 (1.0; 4.0) |
|  | Ankle extension              | 4.0 (4.0; 4.0) | 4.0 (4.0; 4.0) | 4.0(4.0; 4.0)  | 4.0 (4.0; 4.0) |
|  | Toes flexion                 | 4 (3.0; 4.0)   | 4.0 (3.0; 4.0) | 4.0 (4.0; 4.0) | 3.5 (3.0; 4.0) |

|                                      |                           |                   |                   |                   |                  |
|--------------------------------------|---------------------------|-------------------|-------------------|-------------------|------------------|
|                                      | Toes extension            | 4.0 (4.0; 4.0)    | 4.0 (3.3; 4.0)    | 4.0 (4.0; 4.0)    | 4.0 (4.0; 4.0)   |
| Melai et al, 2014 <sup>36</sup>      | Gait Velocity (m/s)       | -.09 (-.13, -.05) | .01 (-.01, .03)   | -.02 (-.06, .02)  | .01 (-.02, .03)  |
|                                      | Stride length             | -.06 (-.09, .03)  | .01 (-.03, .05)   | -.004 (-.04, .03) | .003 (-.04, .04) |
|                                      | Stride time               | .04 (.01, .07)    | -.002 (-.03, .02) | .02 (-.01, .04)   | -.01 (-.03, .02) |
| Taveggia G et al, 2014 <sup>37</sup> | 6-Minute Walk Test        | 330.1 (151.1)     | 313.8 (102.9)     | 395.7 (111.6)     | 373.5 (112.1)    |
|                                      | 10-Meter Walking Test     | 0.8 (0.3)         | 0.8 (0.2)         | 0.8 (0.4)         | 1.0 (0.5)        |
|                                      | Tinetti scale walk        | 9.7 (1.9)         | 9.9 (1.9)         | 11.4 (3.4)        | 10.4 (2.0)       |
| Grewal GS et al, 2015 <sup>39</sup>  | Time spent sitting, %     | 49.8 (15.3)       | 45.9 (20.2)       | 49.8 (16.3)       | 48.9 (17.8)      |
|                                      | Time spent standing, %    | 13.7 (4.9)        | 14.7 (6.5)        | 15.9 (5.1)        | 14.6 (7.0)       |
|                                      | Time spent walking, %     | 6.7 (3.4)         | 7.5 (5.6)         | 8.5 (3.9)         | 7.2 (5.4)        |
|                                      | Total steps taken, n      | 8656 (4,589)      | 9,785 (8,081)     | 11,052 (5,365)    | 9264 (7,670)     |
| Saleh, et al 2019 <sup>40</sup>      | Step length (cm)          | 51.6 (2.8)        | 52.0 (3.4)        | 59.8 (3.0)        | 56.2 (3.2)       |
|                                      | Step time (sec)           | 0.6 (0.05)        | 0.6 (0.06)        | 0.4 (0.08)        | 0.5 (0.07)       |
|                                      | Double support time (sec) | 0.3 (0.04)        | 0.3 (0.03)        | 0.2 ( 0.05)       | 0.2 (0.04)       |
|                                      | Velocity (cm/sec)         | 71.8 (6.8)        | 70.9 (8.0)        | 80.0 (6.8)        | 74.1 (7.9)       |
|                                      | Cadence (step/min)        | 82 ( 2.9)         | 80 (5.6)          | 98.0 (5.2)        | 88.0 (4.7)       |
| Suzuki, K et al, 2019 <sup>22</sup>  | Gait speed (m/s)          | 1.2 (0.1)         | 1.2 (0.1)         | 1.5 ( 0.1)        | 1.3 (0.2)        |
|                                      | Step length (m)           | 0.6 (0.1)         | 0.6 (0.1)         | 0.6 ( 0.1)        | 0.6 (0.1)        |
|                                      | Cadence (step/min)        | 124.2 (11.1)      | 122.9 ( 7.4)      | 131.0 ( 9.0)      | 125.2 (10.7)     |
